# Supplementary material
Source: Frontiers journal article supplement (https://www.frontiersin.org/articles/139458)
Supplement: Image_2.PDF [file Image_2.PDF]

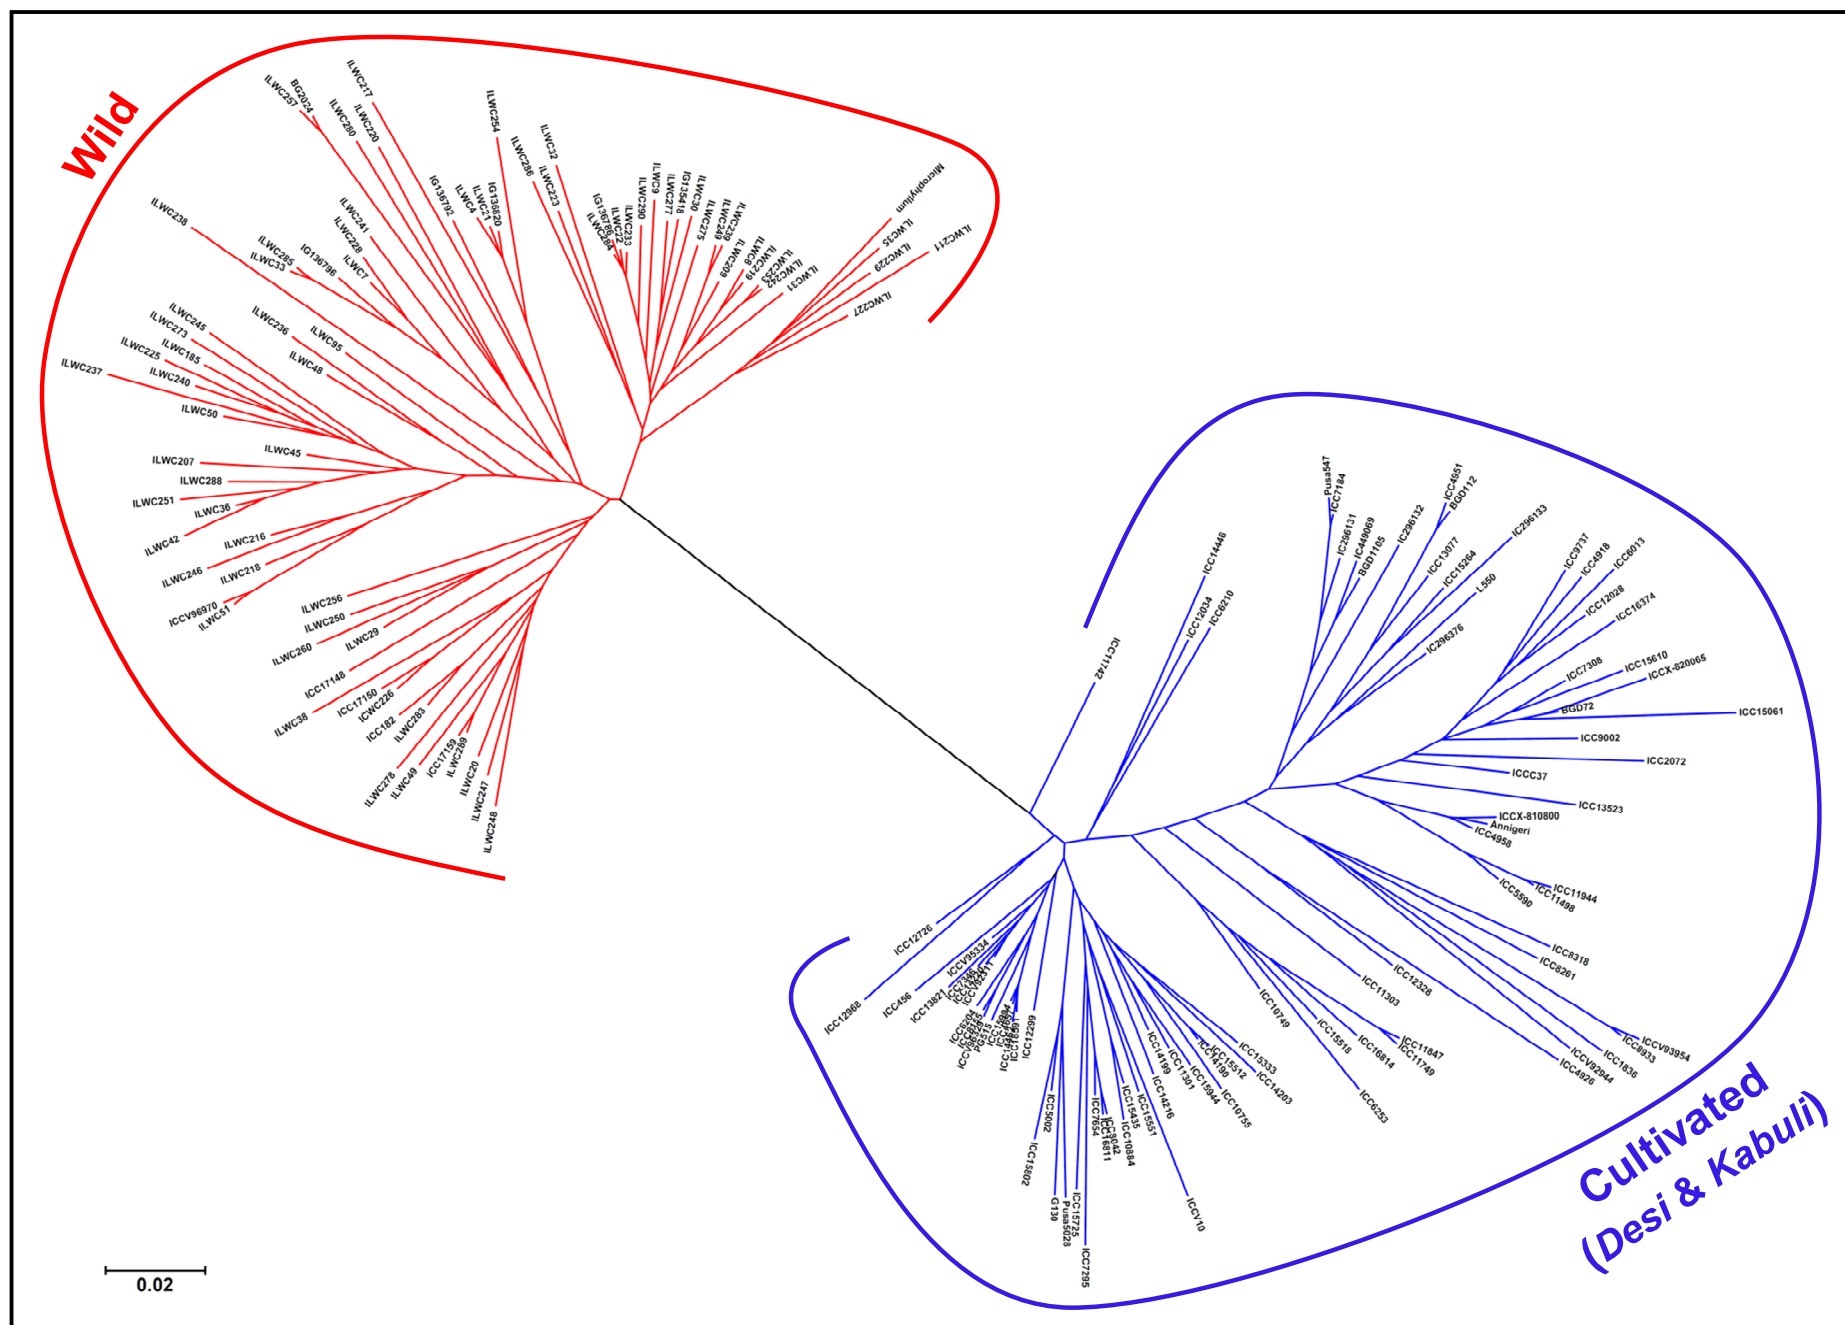

**Figure S2:** The Nei's genetic distance-based unrooted phylogram illustrating the genetic relationships among 172, including 93 cultivated (*desi* and *kabuli*) and 79 wild chickpea accessions using 9045 high-quality genome-wide GBS- and candidate gene-based SNPs.
